# Supplementary material for: Towards a High-Affinity Peptidomimetic Targeting Proliferating Cell Nuclear Antigen from Aspergillus fumigatus
Source: MDPI journal article supplement (doi:10.3390/jof9111098), 2023-11-10
Supplement: s1 [file s1]

### Electronic Supplementary Information

**Table S1. p21 Peptide Surface Plasmon Resonance (SPR) data against AfumPCNA.** The Top Conc is the highest concentration of 8x 1 in 2 dilutions used to calculate the steady state affinity.  $K_D$  is the affinity constant. SD, standard deviation; On/Off, indicate times for contact (on) and dissociation phases (off) of each run. All peptides are C-terminally amidated. Peptides notated with \* were designed and synthesised by Horsfall 2021 [1]. Changes to p21 $\mu$  scaffold are indicated in bold.

| Name                   | Sequence                                                       | $\epsilon_{205}^*$ | Top Conc (nM) | Affinity $K_D$ (nM) | $K_D$ SD (nM) | On/Off (s) |
|------------------------|----------------------------------------------------------------|--------------------|---------------|---------------------|---------------|------------|
| p21 (139-160)          | <sup>139</sup> GRKRRTSMTDFYHSK<br>RRLIFS                       | 98620              | 500           | 69.71               | 20.21         | 40/30      |
| *p21 $\mu$             | KRRQTSMTDFYHSKR                                                | 67860              | 1200          | 265.1               | 5.97          | 40/30      |
| *p21 $\mu$ -RD2        | KRRQ <b>TRITEY</b> FHSKR                                       | 67380              | 150           | 20.33               | 6.84          | 40/30      |
| *p21 $\mu$ -Q144M      | KRR <b>MT</b> SMTDFYHSKR                                       | 69290              | 32,000        | 41,400              | 820           | 40/30      |
| *p21 $\mu$ -T145K      | KRRQ <b>K</b> SMTDFYHSKR                                       | 67860              | 128,000       | 10,000              | 65            | 40/30      |
| *p21 $\mu$ -T145D      | KRRQ <b>D</b> SMTDFYHSKR                                       | 67860              | 64,000        | 4110                | 310           | 40/30      |
| *p21 $\mu$ -S146R      | KRRQ <b>T</b> RMTDFYHSKR                                       | 69210              | 1000          | 64.4                | 18.4          | 40/30      |
| *p21 $\mu$ -M147L      | KRRQ <b>TSL</b> TDYFHSKR                                       | 66030              | 5171.2        | 382                 | 51.04         | 40/30      |
| *p21 $\mu$ -M147I      | KRRQ <b>T</b> SITDFYHSKR                                       | 66030              | 500           | 37.05               | 7.84          | 40/30      |
| *p21 $\mu$ -D149E      | KRRQTSMT <b>E</b> FYHSKR                                       | 67860              | 1000          | 400.66              | 45.54         | 40/30      |
| *p21 $\mu$ -F150Y      | KRRQTSMTD <b>Y</b> YHSKR                                       | 65340              | 646.4         | 75.20               | 18.92         | 40/30      |
| *p21 $\mu$ -Y151F      | KRRQTSMTD <b>F</b> FHSKR                                       | 70380              | 1292.8        | 167.2               | 19.07         | 40/30      |
| *p21 $\mu$ -FY150151YF | KRRQTSMTD <b>Y</b> FHSKR                                       | 67860              | 1292.8        | 96.4                | 19.6          | 40/30      |
| p21 $\mu$ -AfumDNALIG  | KRR <b>Q</b> R <b>V</b> R <b>S</b> I <b>A</b> S <b>F</b> FHSKR | 74030              | 8000          | 458                 | 117.77        | 40/30      |
| p21 $\mu$ -AfumDNAPOL  | KRR <b>Q</b> K <b>E</b> L <b>S</b> R <b>F</b> D <b>F</b> HSKR  | 69900              | 10,000        | 659.3               | 105.8         | 40/30      |
| p21 $\mu$ -AfumFEN1    | KRR <b>Q</b> S <b>R</b> L <b>E</b> G <b>F</b> FHSKR            | 67120              | 10,000        | 713                 | 56.9          | 40/30      |
| p21 $\mu$ -AfumRFC     | KRR <b>M</b> P <b>T</b> D <b>I</b> R <b>N</b> F <b>F</b> HSKR  | 71730              | 2000          | 94.84               | 8.76          | 40/30      |

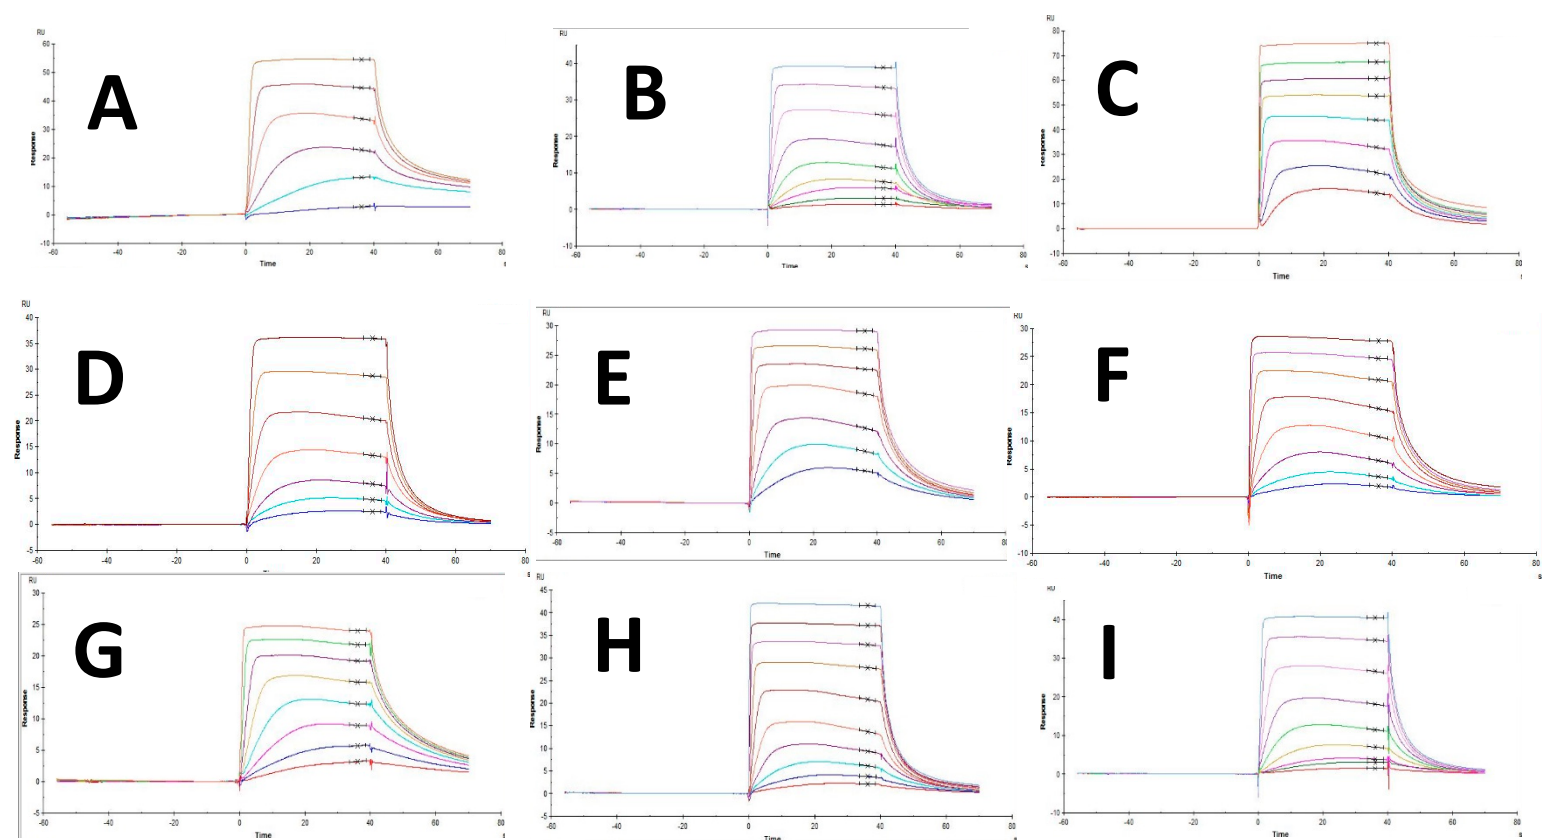

**Figure S1. Representative sample of SPR sensorgrams testing peptide library against AfumPCNA.**

**A)** p21 (139-160). **B)** p21 $\mu$ . **C)** p21 $\mu$ -AfumRFC. **D)** p21 $\mu$ -149E. **E)** p21 $\mu$ -150Y. **F)** p21 $\mu$ -151F. **G)** p21 $\mu$ -147I. **H)** p21 $\mu$ -147L. **I)** p21 $\mu$ -RD2.

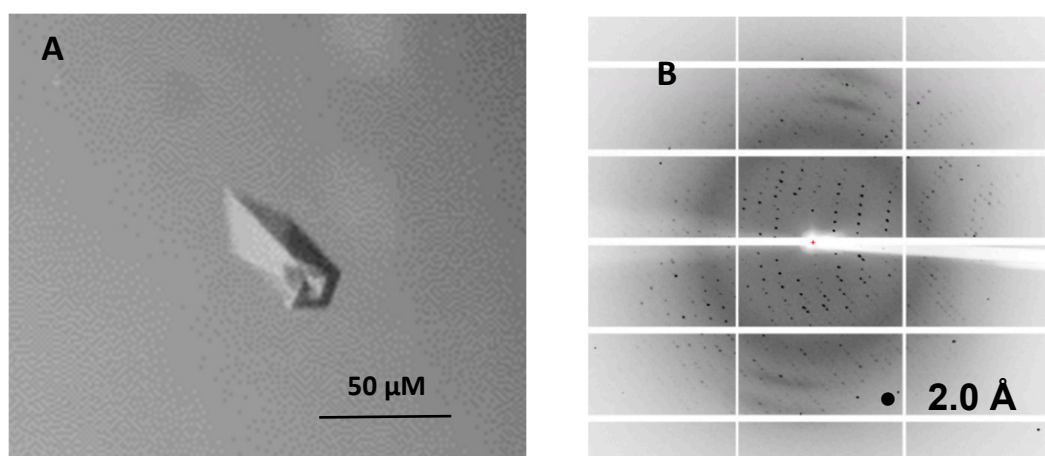

**Figure S2. A)** Protein crystal of AfumPCNA bound with p21 $\mu$  crystal grown in 0.2M Tacsimate pH 4.0 0.1M Na Acetate, 16% PEG 3350 at 16 degrees Celsius after about 3 weeks. **B)** Diffraction image of protein crystal of AfumPCNA bound with p21 $\mu$  diffracting at 2.0 Å.

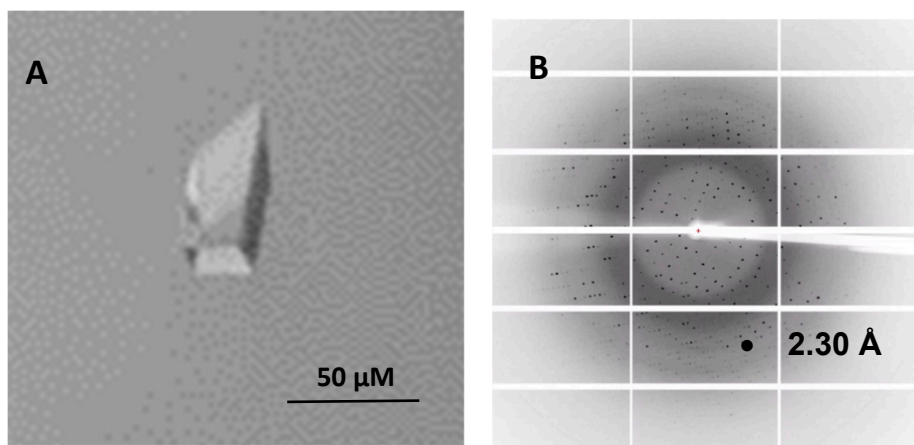

**Figure S3. A)** Protein crystal of AfumPCNA bound with p21μ-AfumRFC grown in 0.2M Tacsimate pH 4.0 0.1M Na Acetate, 16% PEG 3350 tray at 16 degrees celcius after 3 weeks. **B)** Diffraction image of protein crystal of AfumPCNA bound with p21μ-AfumRFC diffracting at 2.30 Å.

**Table S2.** Data collection and refinement statistics of AfumPCNA bound with p21μ structure (PDB:8GJF) and AfumPCNA bound with p21μ-AfumRFC structure (PDB:8GJ5). Statistics for the highest-resolution shell are shown in parentheses. Statistics for the highest-resolution shell are shown in parentheses.

| Parameter                      | 8GJF                           | 8GJ5                           |
|--------------------------------|--------------------------------|--------------------------------|
| Wavelength                     | 0.9537                         | 0.9537                         |
| Resolution range               | 36.55 - 2.0 (2.071 - 2.0)      | 47.2 - 2.3 (2.383 - 2.301)     |
| Space group                    | C 1 2 1                        | P 21 21 21                     |
| Unit cell                      | 146.0 84.8 70.4 90.0 91.4 90.0 | 83.9 97.0 108.1 90.0 90.0 90.0 |
| Total reflections              | 114807 (11427)                 | 79454 (7729)                   |
| Unique reflections             | 57621 (5742)                   | 39748 (3880)                   |
| Multiplicity                   | 2.0 (2.0)                      | 2.0 (2.0)                      |
| Completeness (%)               | 99.1 (99.2)                    | 99.8 (99.2)                    |
| Mean I/sigma(I)                | 13.2 (1.6)                     | 21.0 (1.4)                     |
| Wilson B-factor                | 38.4                           | 50.6                           |
| R-merge                        | 0.032 (0.49)                   | 0.024 (0.57)                   |
| R-meas                         | 0.045 (0.69)                   | 0.034 (0.81)                   |
| R-pim                          | 0.031 (0.49)                   | 0.024 (0.57)                   |
| CC1/2                          | 0.99 (0.64)                    | 1.00 (0.63)                    |
| CC*                            | 1.00 (0.89)                    | 1 (0.88)                       |
| Reflections used in refinement | 57608 (5742)                   | 39732 (3878)                   |
| Reflections used for R-free    | 2888 (263)                     | 2021 (203)                     |
| R-work                         | 0.23 (0.34)                    | 0.23 (0.34)                    |
| R-free                         | 0.27 (0.38)                    | 0.25 (0.36)                    |
| CC(work)                       | 0.95 (0.71)                    | 0.94 (0.71)                    |
| CC(free)                       | 0.92 (0.58)                    | 0.94 (0.67)                    |
| Number of non-hydrogen atoms   | 6392                           | 6018                           |
| macromolecules                 | 5971                           | 5874                           |
| solvent                        | 421                            | 144                            |
| Protein residues               | 803                            | 797                            |
| RMS(bonds)                     | 0.005                          | 0.004                          |
| RMS(angles)                    | 1.20                           | 0.93                           |
| Ramachandran favored (%)       | 97.35                          | 94.78                          |
| Ramachandran allowed (%)       | 2.28                           | 4.59                           |
| Ramachandran outliers (%)      | 0.38                           | 0.64                           |
| Rotamer outliers (%)           | 0.32                           | 0.00                           |
| Clashscore                     | 6.86                           | 6.66                           |
| Average B-factor               | 50.00                          | 58.67                          |
| macromolecules                 | 49.85                          | 58.75                          |
| solvent                        | 52.20                          | 55.44                          |

<sup>a</sup>  $R_{merge} = \sum |I - \langle I \rangle| / \sum I$ .

<sup>b</sup>  $R_{pim} = \sum h [1 / (n_h - 1)]^{1/2} \sum_i |<I_h> - I_{h,i}| / \sum_h \sum_i I_{h,i} (2)$

<sup>c</sup>  $R_{work} = \sum |F_o - F_c| / \sum |F_o|$  for all data excluding data used to calculate Rfree.

<sup>d</sup>  $R_{free} = \sum |F_o - F_c| / \sum |F_o|$  for all data.

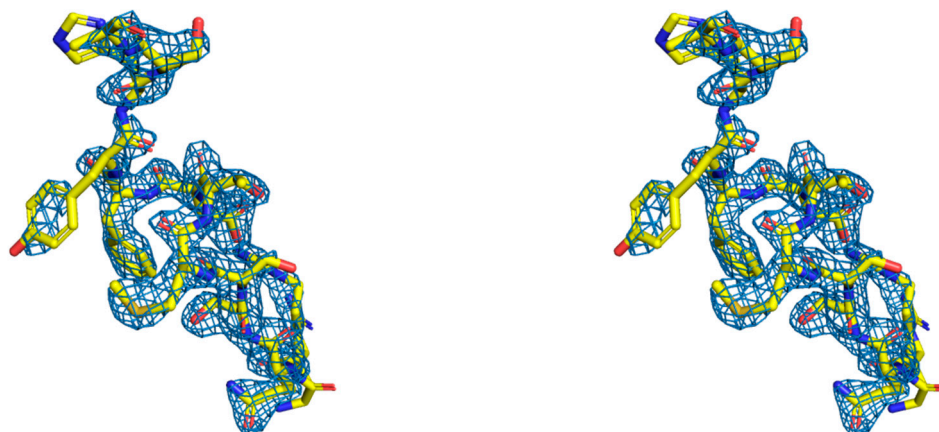

**Figure S4.** Representative electron density of **p21μ** (yellow, sticks) shown as a wall-eye stereo image  $2F_o - F_c$  composite omit map, view contoured at  $1.5\sigma$ .

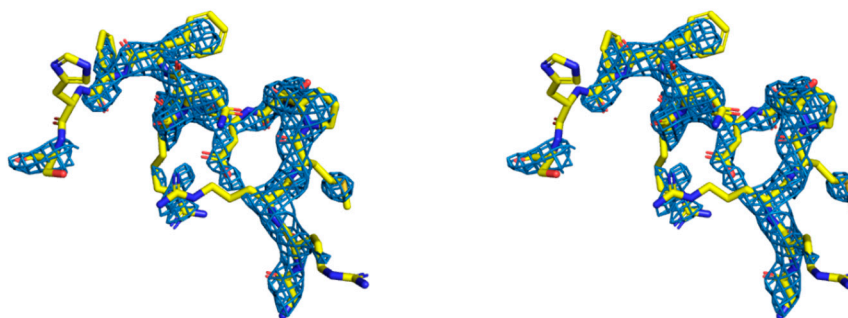

**Figure S5.** Representative electron density of **p21μ-AfumRFC** (yellow, sticks) shown as a wall-eye stereo image  $2F_o - F_c$  composite omit map, view contoured at  $1.5\sigma$ .

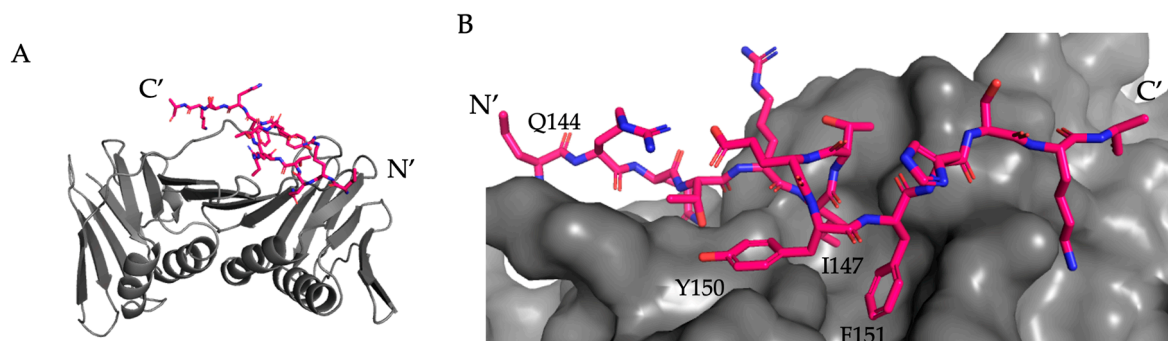

**Figure S6.** Computationally modelled structure of **p21 $\mu$ -RD2** (pink, sticks) on the PIP-box binding site of a AfumPCNA monomer (grey, cartoon). A) Monomer. Peptide N and C terminus labelled. B) Surface, Conserved PIP box residues of peptide are labelled. Peptide N and C terminus labelled.

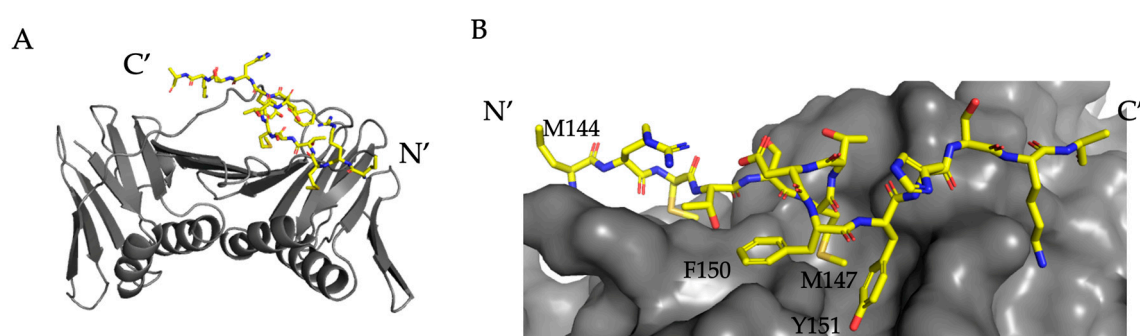

**Figure S7.** Computationally modelled structure of **p21 $\mu$ -Q144M** (yellow, sticks) on the PIP-box binding site of a AfumPCNA monomer (grey, cartoon). A) Monomer. Peptide N and C terminus labelled. B) Surface, Conserved PIP box residues of peptide are labelled. Peptide N and C terminus labelled.

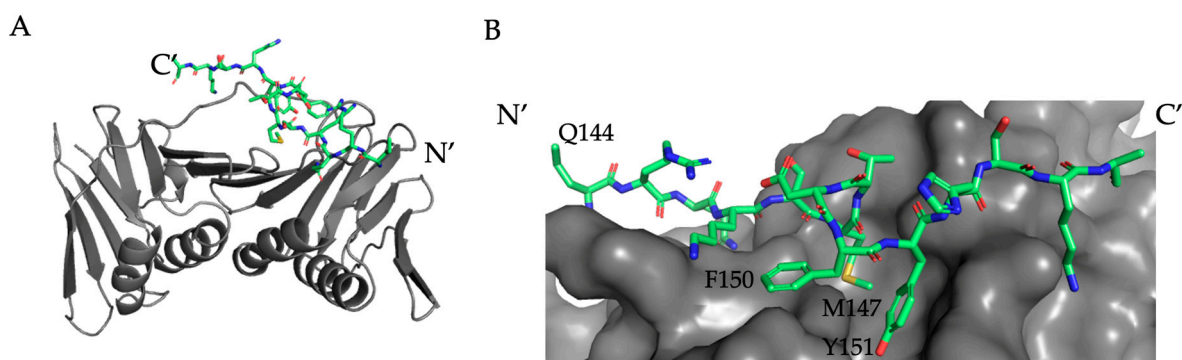

**Figure S8.** Computationally modelled structure of **p21 $\mu$ -T145K** (lime green, sticks) on the PIP-box binding site of a AfumPCNA monomer (grey, cartoon). A) Monomer. Peptide N and C terminus labelled. B) Surface, Conserved PIP box residues of peptide are labelled. Peptide N- and C- terminus labelled.



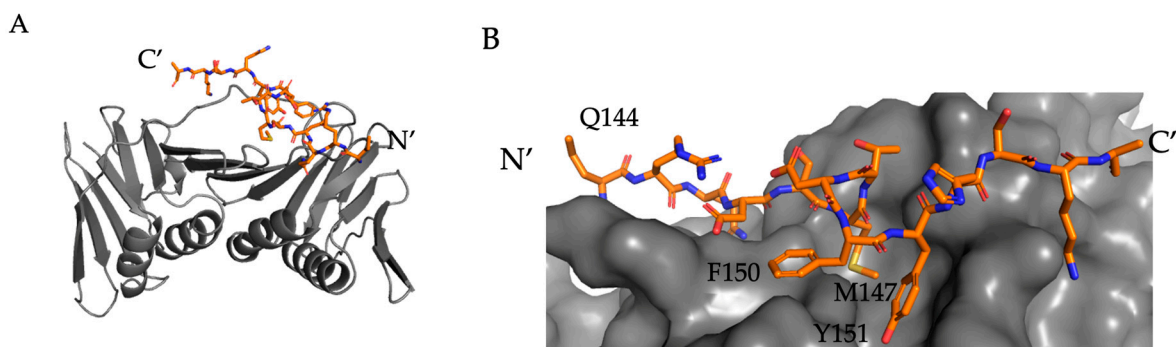

**Figure S9.** Computationally modelled structure of **p21<sub>μ</sub>-T145D** (orange, sticks) on the PIP-box binding site of a AfumPCNA monomer (grey, cartoon). A) Monomer. Peptide N and C terminus labelled. B) Surface, Conserved PIP box residues of peptide are labelled. Peptide N and C terminus labelled.

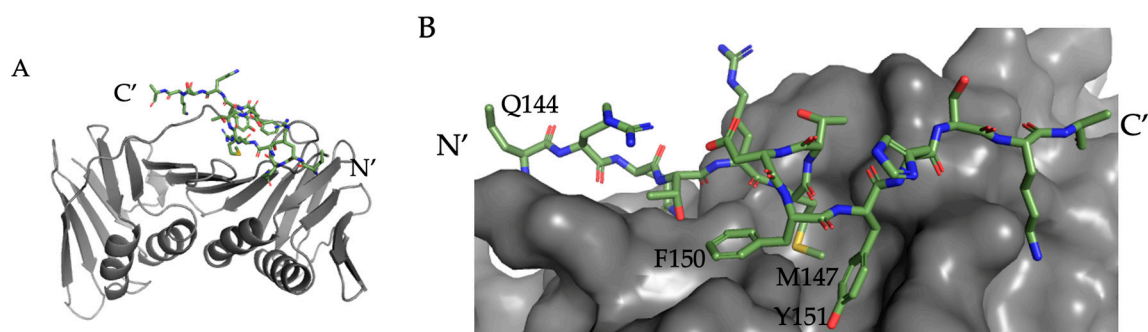

**Figure S10.** Computationally modelled structure of **p21<sub>μ</sub>-S146R** (olive, sticks) on the PIP-box binding site of a AfumPCNA monomer (grey, cartoon). A) Monomer. Peptide N- and C-terminus labelled. B) Surface, Conserved PIP box residues of peptide are labelled. Peptide N- and C-terminus labelled.

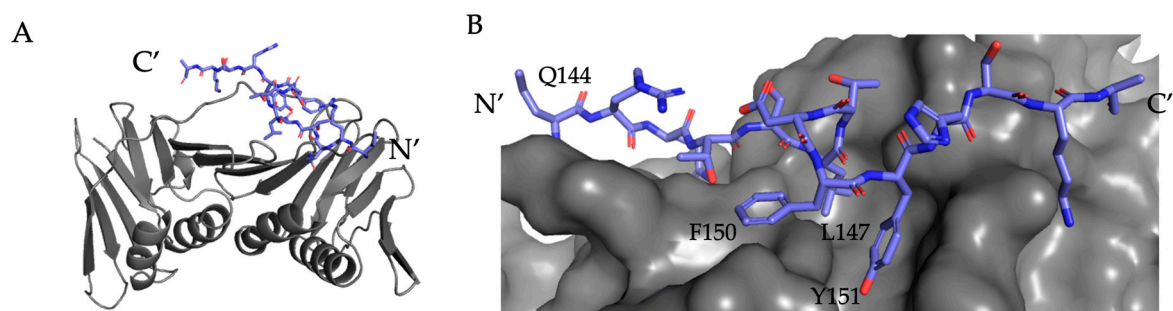

**Figure S11.** Computationally modelled structure of **p21<sub>μ</sub>-M147L** (lilac, sticks) on the PIP-box binding site of a AfumPCNA monomer (grey, cartoon). A) Monomer. Peptide N- and C-terminus labelled. B) Surface, Conserved PIP box residues of peptide are labelled. Peptide N- and C-terminus labelled.

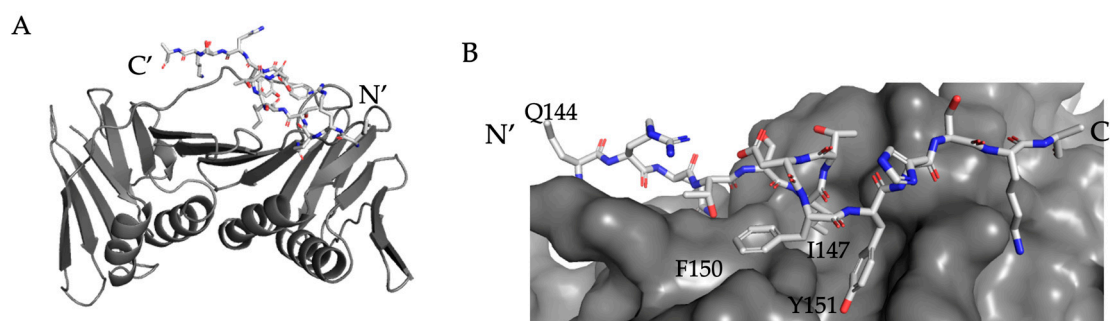

**Figure S12.** Computationally modelled structure of **p21 $\mu$ -M147I** (light grey, sticks) on the PIP-box binding site of a AfumPCNA monomer (grey, cartoon). A) Monomer. Peptide N- and C-terminus labelled. B) Surface, Conserved PIP box residues of peptide are labelled. Peptide N- and C-terminus labelled.

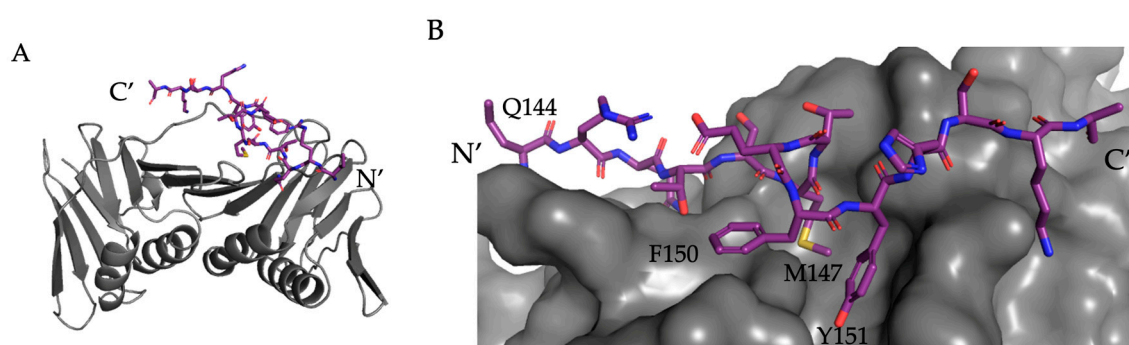

**Figure S13.** Computationally modelled structure of **p21 $\mu$ -D149E** (purple, sticks) on the PIP-box binding site of a AfumPCNA monomer (grey, cartoon). A) Monomer. Peptide N- and C-terminus labelled. B) Surface, Conserved PIP box residues of peptide are labelled. Peptide N- and C-terminus labelled.

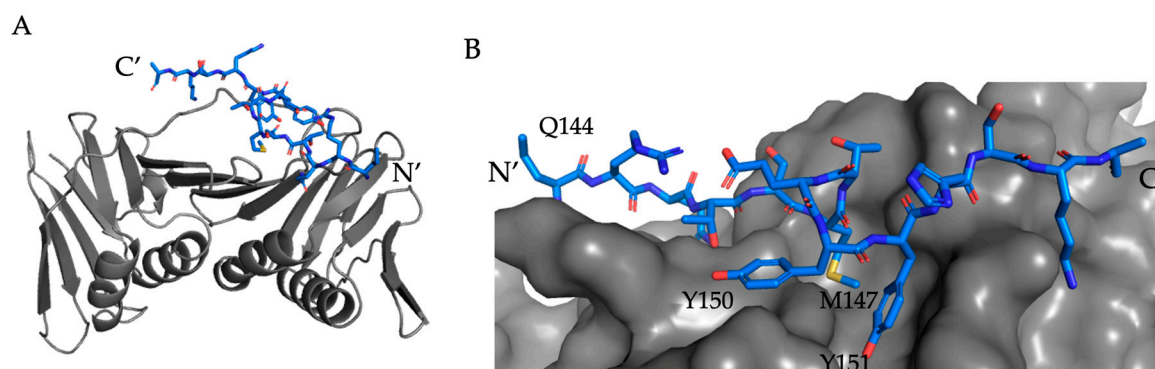

**Figure S14.** Computationally modelled structure of **p21 $\mu$ -F150Y** (blue, sticks) on the PIP-box binding site of a AfumPCNA monomer (grey, cartoon). A) Monomer. Peptide N- and C-terminus labelled. B) Surface, Conserved PIP box residues of peptide are labelled. Peptide N- and C-terminus labelled.

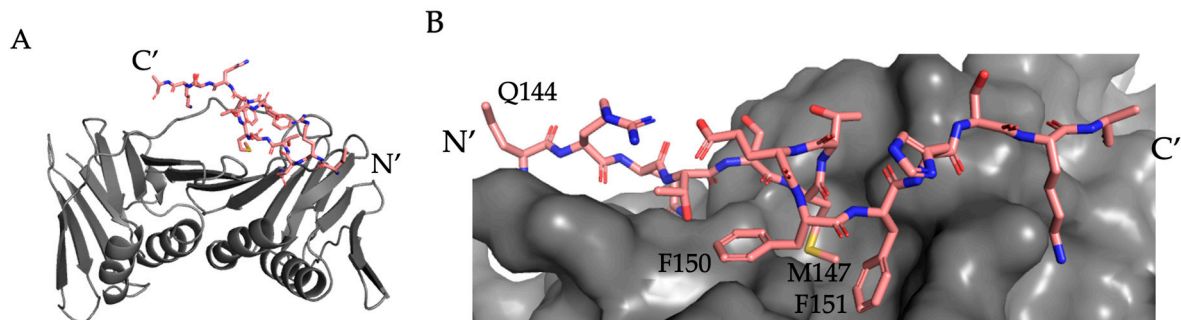

**Figure S15.** Computationally modelled structure of **p21 $\mu$ -Y151F** (salmon, sticks) on the PIP-box binding site of a AfumPCNA monomer (grey, cartoon). A) Monomer. Peptide N- and C-terminus labelled. B) Surface, Conserved PIP box residues of peptide are labelled. Peptide N- and C-terminus labelled.

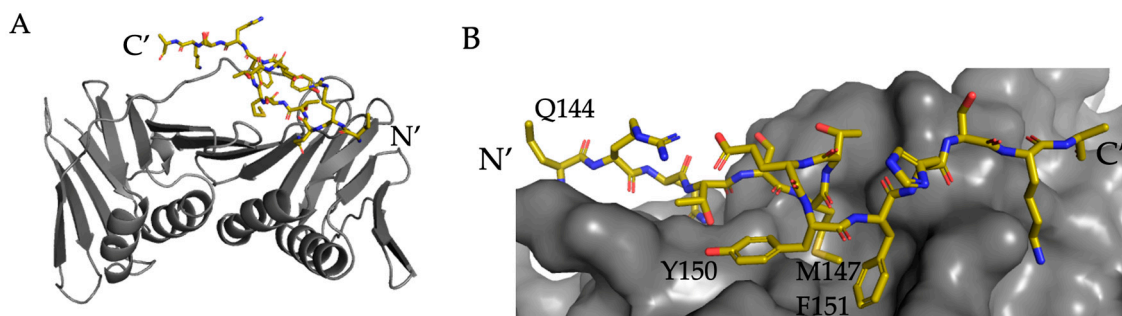

**Figure S16.** Computationally modelled structure of **p21 $\mu$ -FY150I51YF** (gold, sticks) on the PIP-box binding site of a AfumPCNA monomer (grey, cartoon). A) Monomer. Peptide N- and C-terminus labelled. B) Surface, Conserved PIP box residues of peptide are labelled. Peptide N- and C-terminus labelled.

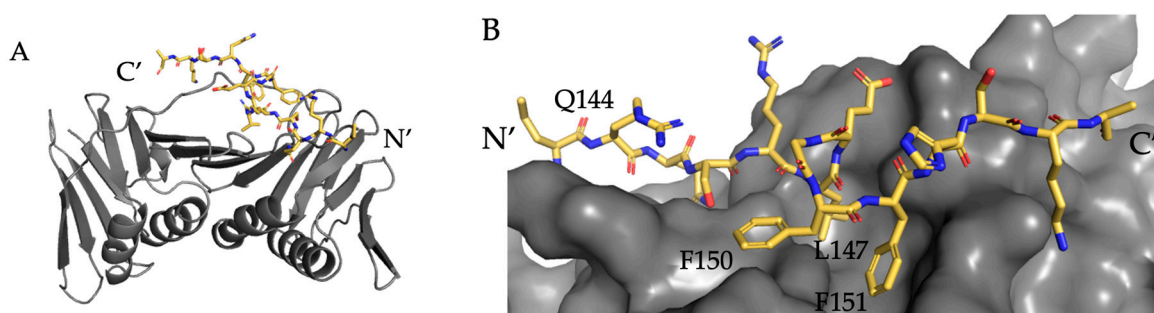

**Figure S17.** Computationally modelled structure of **p21 $\mu$ -AfumFEN1** (yellow, sticks) on the PIP-box binding site of a AfumPCNA monomer (grey, cartoon). A) Monomer. Peptide N- and C-terminus labelled. B) Surface, Conserved PIP box residues of peptide are labelled. Peptide N- and C-terminus labelled.



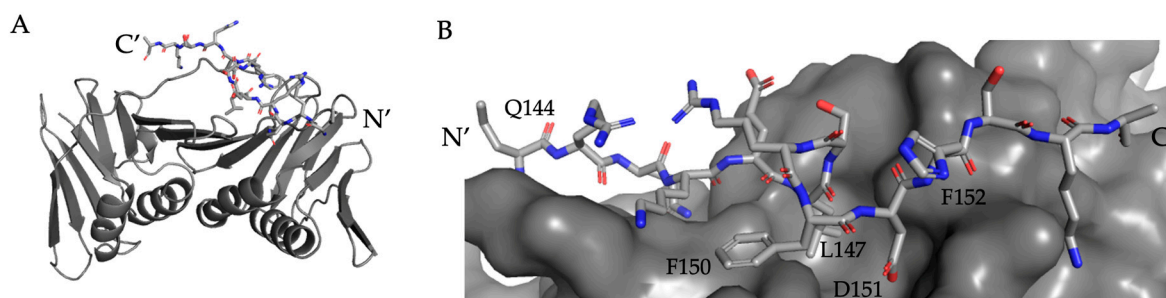

**Figure S18.** Computationally modelled structure of **p21μ-AfumDNAPOL** (grey, sticks) on the PIP-box binding site of a AfumPCNA monomer (grey, cartoon). A) Monomer. Peptide N- and C-terminus labelled. B) Surface, Conserved PIP box residues of peptide are labelled. Peptide N- and C-terminus labelled.

## References

[1]Horsfall, A. J., Vandborg, B. A., Kowalczyk, W., Chav, T., Scanlon, D. B., Abell, A. D., and Bruning, J. B. Unlocking the PIP-box: A peptide library reveals interactions that drive high-affinity binding to human PCNA. *J Biol Chem* (2021) 296, 100773, 10.1016/j.jbc.2021.100773.
